# Supplementary material for: Comb-shaped polyzwitterion with surface-activity obtained via N-maleoyl chitosan-modified HPAM for displacement of residual oil
Source: Royal Society of Chemistry journal article supplement (doi:10.1039/c8nj00951a), 2018-01-01
Supplement: c8nj00951a1.pdf [file c8nj00951a1.pdf]

## New Journal of Chemistry

### Supporting Information

# Comb-Shaped Polyzwitterion with Surface-Activity via N-maleoyl Chitosan Modified HPAM for Displacement of Residual Oil

Shiwei Li<sup>a</sup>, Shaohua Gou<sup>\*ab</sup>, Xin Chen<sup>a</sup> and Ming Duan<sup>\*ab</sup>

<sup>a</sup> Oil & Gas Field Applied Chemistry Key Laboratory of Sichuan Province, Southwest Petroleum University, Chengdu 610500, People's Republic of China.

<sup>b</sup> State Key Laboratory of Oil and Gas Reservoir Geology and Exploitation, Southwest Petroleum University, Chengdu 610500, People's Republic of China.

## 1. Optimum Conditions

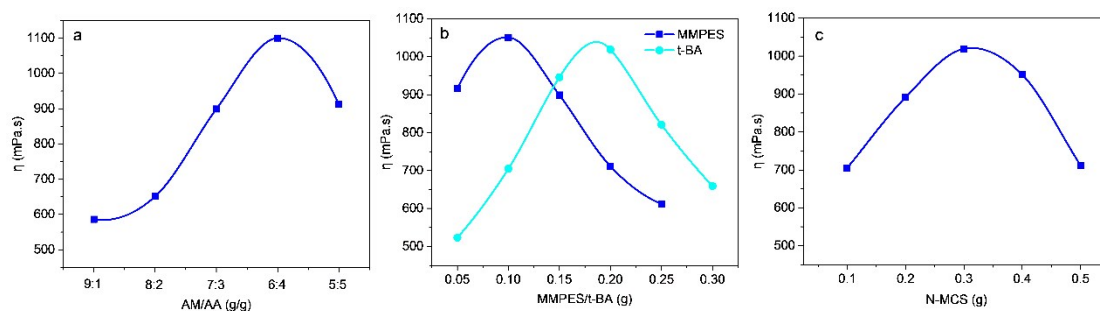

**Fig. S1** The optimum mass of monomers.

**Table S1.** The effects of the ratio of AM, AA, MMPES, t-BA and N-MCS on PNMASt.

| AM (g) | AA (g) | N-MCS (g) | MMPES (g) | t-BA (g) | $\eta$ (mPa·s) <sup>b</sup> |
|--------|--------|-----------|-----------|----------|-----------------------------|
| 9      | 1      | 0.3       | 0.1       | 0.2      | 594                         |
| 8      | 2      | 0.3       | 0.1       | 0.2      | 651                         |
| 7      | 3      | 0.3       | 0.1       | 0.2      | 907                         |
| 5      | 5      | 0.3       | 0.1       | 0.2      | 924                         |
| 6      | 4      | 0.3       | 0.1       | 0.2      | 1080                        |
| 6      | 4      | 0.5       | 0.1       | 0.2      | 706                         |
| 6      | 4      | 0.4       | 0.1       | 0.2      | 949                         |
| 6      | 4      | 0.2       | 0.1       | 0.2      | 893                         |
| 6      | 4      | 0.1       | 0.1       | 0.2      | 701                         |
| 6      | 4      | 0.3       | 0.05      | 0.2      | 922                         |
| 6      | 4      | 0.3       | 0.15      | 0.2      | 886                         |
| 6      | 4      | 0.3       | 0.2       | 0.2      | 716                         |
| 6      | 4      | 0.3       | 0.25      | 0.2      | 625                         |
| 6      | 4      | 0.3       | 0.1       | 0.05     | 537                         |
| 6      | 4      | 0.3       | 0.1       | 0.1      | 706                         |
| 6      | 4      | 0.3       | 0.1       | 0.15     | 939                         |
| 6      | 4      | 0.3       | 0.1       | 0.25     | 816                         |
| 6      | 4      | 0.3       | 0.1       | 0.3      | 683                         |

<sup>a</sup>Conditions: initiator loading= 0.03g, pH= 7, Temperature= 40 °C.

<sup>b</sup>Apparent viscosity: copolymer solution=2000 mg/L, HAAKE MARS III rheometer (HAAKE, Germany) at 30 °C.

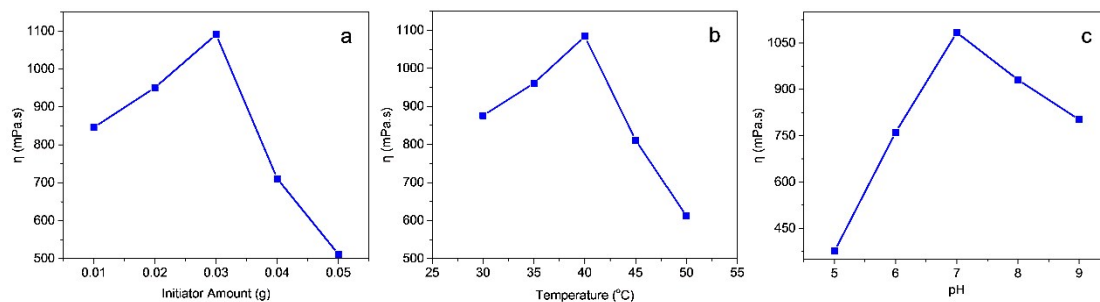

**Fig. S2** Optimum amount of initiator, pH value and temperature.

**Table S2.** The effects of the initiator concentration, pH and temperature on PNMAS<sub>t</sub>.

| Initiator (g) | pH | Temperature (°C) | $\eta$ (mPa·s) <sup>b</sup> |
|---------------|----|------------------|-----------------------------|
| 0.01          | 7  | 40               | 851                         |
| 0.02          | 7  | 40               | 946                         |
| 0.03          | 7  | 40               | 1080                        |
| 0.04          | 7  | 40               | 697                         |
| 0.05          | 7  | 40               | 508                         |
| 0.03          | 5  | 40               | 386                         |
| 0.03          | 6  | 40               | 757                         |
| 0.03          | 8  | 40               | 970                         |
| 0.03          | 9  | 40               | 770                         |
| 0.03          | 11 | 40               | — <sup>c</sup>              |
| 0.03          | 7  | 30               | 874                         |
| 0.03          | 7  | 35               | 957                         |
| 0.03          | 7  | 45               | 791                         |
| 0.03          | 7  | 50               | 603                         |

<sup>a</sup>Conditions: AA/AM/N-MCS/MMPES/t-BA = 6/4/0.3/0.1/0.2 (g).

<sup>b</sup>Apparent viscosity: copolymer solution=2000 mg/L, HAAKE MARS III rheometer (HAAKE, Germany) at 30 °C..

<sup>c</sup>situation: obvious copolymerization was not observed.

According to above, the optimum conditions is that, N-MCS: 0.3g, AM/AA: 6g/4g, MMPES: 0.1g, t-BA: 0.2g, initiator: 0.03g; pH=7; T=40 °C.

## 2. Measurement of the intrinsic viscosity for copolymer

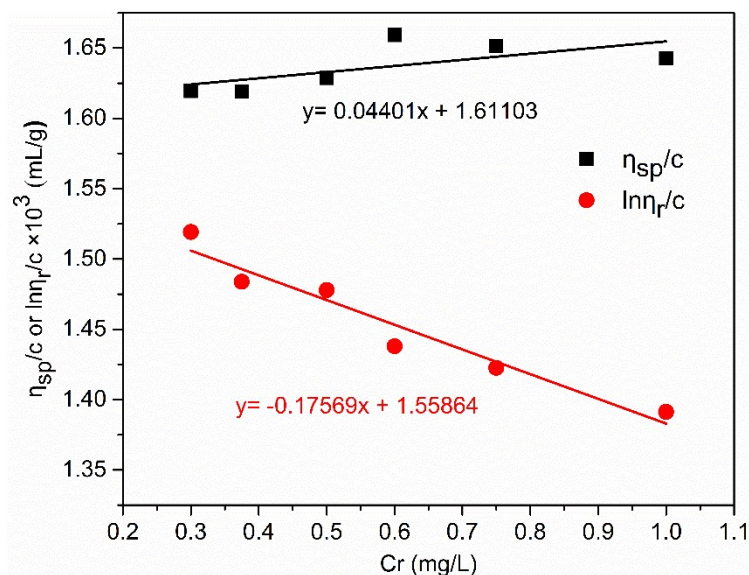

**Fig. S3.** The  $\eta_{sp}/c$  and  $\ln\eta_r/c$  relationship with the concentration of PNMASt.

As shown in Fig. S3, it was clear that the values of two fitting curve ( $\eta_{sp}/c$  and  $\ln\eta_r/c$ ) fitted to the ordinate was 1611.03, 1558.64 mL/g, respectively, and so, the intrinsic viscosity of PNMASt was about 1590 mL/g.

## 3. Measurement of monomer conversion for PNMASt

High-performance liquid chromatography (HPLC; Shimadzu Co., Japan) as a reliable method to get monomer conversion of PNMASt. H<sub>2</sub>O (UP):CH<sub>3</sub>OH (99%) as the mobile phase (1.0 mL/min) flowed through a C<sub>18</sub> chromatographic column (40 °C) and a UV detector (wavelength: 210 nm). Following eq calculated the conversion of monomers from PNMASt with the content of unconverted monomers from ethanol that which was to purify PNMASt:

$$D (\%) = \frac{W - \frac{SC_0}{S_0} \times V}{W} \times 100\% \quad (1)$$

Where  $D$  is conversion of monomer,  $W$  is total mass of monomer,  $S$  is the peak value of measured monomer in ethanol,  $C_0$  and  $S_0$  are concentration and peak of corresponding standard sample of measured monomer,  $V$  is the volume of ethanol for purified PNMASt.

The function of monomers' peak area (AA, AM, MMPES and t-BA) and concentration was shown as following:

$$S_{AM}=1641090+4.44112\times 10^7\times C, S_{AA}=919876.33002+1.37002\times 10^7\times C,$$

$$S_{t-BA}=239896.60023+3.10056\times 10^6\times C, S_{MMPES}=501272.23518+3.96531\times 10^6\times C,$$

On the basis of the results, the conversion for AM, AA, MMPES and t-BA are 99.24%, 93.78%, 79.49% and 82.03% separately. The purified copolymer is 10.1904 g.

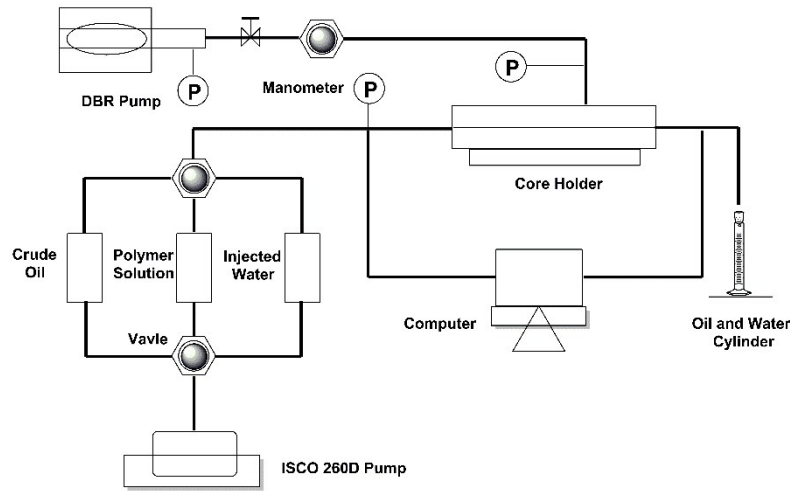

**Fig. S4** The experimental apparatus of core displacement experiment.

**Table S3** Basic Information for Artificial Core

| Core No.       | Permeability<br>(D) <sup>a</sup> | PV (ml) | Porosity (%) | Oil saturation<br>(%) |
|----------------|----------------------------------|---------|--------------|-----------------------|
| 1 <sup>#</sup> | 1.79                             | 45.8    | 37.58        | 89.24%                |
| 2 <sup>#</sup> | 1.85                             | 44.9    | 36.69        | 89.15%                |

<sup>a</sup> Determined by Darcy's Law.

**Table S4** Parameters of simulated formation water from shengli oilfield

| Inorganic ions      | K <sup>+</sup> , Na <sup>+</sup> | Ca <sup>2+</sup> | Mg <sup>2+</sup> | CO <sub>3</sub> <sup>2-</sup> | HCO <sub>3</sub> <sup>-</sup> | SO <sub>4</sub> <sup>2-</sup> | Cl <sup>-</sup> | Total   | pH   |
|---------------------|----------------------------------|------------------|------------------|-------------------------------|-------------------------------|-------------------------------|-----------------|---------|------|
| Concentration(mg/L) | 3091.96                          | 276.17           | 158.68           | 14.21                         | 311.48                        | 85.29                         | 5436.34         | 9374.13 | 7.12 |

**Table S5** Experimental results of EOR and mobility control ability

| Polymer | P <sub>0</sub> | P <sub>1</sub> | P <sub>2</sub> | R <sub>f</sub> | RR <sub>f</sub> | E <sub>1</sub> | E <sub>2</sub> | EOR   |
|---------|----------------|----------------|----------------|----------------|-----------------|----------------|----------------|-------|
| Item    | (MPa)          | (MPa)          | (MPa)          |                |                 | (%)            | (%)            | (%)   |
| HPAM    | 0.011          | 0.093          | 0.021          | 8.45           | 1.91            | 57.32          | 50.11          | 7.21  |
| PNMASt  | 0.013          | 0.24           | 0.086          | 18.23          | 6.62            | 66.94          | 53.62          | 13.32 |

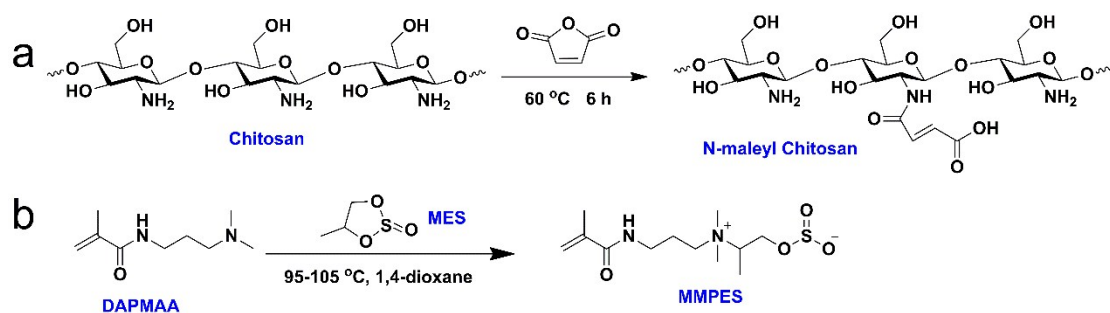

**Fig. S5.** Schematic diagram for synthesis, (a): N-MCS; (b): MMPES
